# Dual Actions of Enflurane on Postsynaptic Currents Abolished by the $\gamma$ -Aminobutyric Acid Type A Receptor $\beta_3$ (N265M) Point Mutation

Berthold Drexler, M.D.,\* Rachel Jurd, Ph.D.,† Uwe Rudolph, M.D.,‡ Bernd Antkowiak, Ph.D.§

**Background:** At concentrations close to 1 minimum alveolar concentration (MAC)-immobility, volatile anesthetics display blocking and prolonging effects on  $\gamma$ -aminobutyric acid type A receptor-mediated postsynaptic currents. It has been proposed that distinct molecular mechanisms underlie these dual actions. The authors investigated whether the blocking or the prolonging effect of enflurane is altered by a point mutation (N265M) in the  $\beta_3$  subunit of the  $\gamma$ -aminobutyric acid type A receptor. Furthermore, the role of the  $\beta_3$  subunit in producing the depressant actions of enflurane on neocortical neurons was elucidated.

**Methods:** Spontaneous inhibitory postsynaptic currents were sampled from neocortical neurons in cultured slices derived from wild-type and  $\beta_3$ (N265M) mutant mice. The effects of 0.3 and 0.6 mM enflurane on decay kinetics, peak amplitude, and charge transfer were quantified. Furthermore, the impact of enflurane-induced changes in spontaneous action potential firing was evaluated by extracellular recordings in slices from wild-type and mutant mice.

**Results:** In slices derived from wild-type mice, enflurane prolonged inhibitory postsynaptic current decays and decreased peak amplitudes. Both effects were almost absent in slices from  $\beta_3$ (N265M) mutant mice. At clinically relevant concentrations between MAC-awake and MAC-immobility, the anesthetic was less effective in depressing spontaneous action potential firing in slices from  $\beta_3$ (N265M) mutant mice compared with wild-type mice.

**Conclusion:** At concentrations between MAC-awake and MAC-immobility,  $\beta_3$ -containing  $\gamma$ -aminobutyric acid type A receptors contribute to the depressant actions of enflurane in the neocortex. The  $\beta_3$ (N265M) mutation affects both the prolonging and blocking effects of enflurane on  $\gamma$ -aminobutyric acid type A receptor-mediated inhibitory postsynaptic currents in neocortical neurons.

MICE harboring an N265M point mutation in the  $\beta_3$  subunit of the  $\gamma$ -aminobutyric acid type A (GABA<sub>A</sub>) receptor are useful tools for investigating the role of this

subunit in general anesthesia.<sup>1,2</sup> Recently, the effects of several volatile anesthetics have been examined in these mice to answer the question of whether the  $\beta_3$  subunit is involved in mediating amnesia, hypnosis, or immobility.<sup>3-5</sup> Conclusions drawn from these behavioral studies are based on the assumption that, on the molecular level, the N265M mutation significantly attenuates the effects of volatile anesthetics at  $\beta_3$ -containing GABA<sub>A</sub> receptors. However, experimental evidence supporting this assumption is limited.

Sieglwart *et al.*<sup>6</sup> reported that enflurane augments GABA-evoked currents in wild-type but significantly less in mutated  $\alpha_2\beta_3\gamma_2$  recombinant receptors expressed in human embryonic kidney 293 cells. In this work, effects of enflurane were evaluated in the presence of 3  $\mu$ M GABA in wild-type and 30  $\mu$ M GABA in mutant receptors corresponding to EC<sub>50</sub> values. However, these findings do not predict how the mutation affects GABA<sub>A</sub> receptor-mediated synaptic transmission. At intact central synapses, the GABA concentration within the synaptic cleft rises into the millimolar range.<sup>7</sup> Furthermore, effects of volatile anesthetics at GABA<sub>A</sub> receptors substantially depend on the concentration of GABA. In the case that this concentration is approximately 1 mM, volatile anesthetics not only enhance GABA<sub>A</sub> receptor function but also induce receptor blockade.<sup>8,9</sup> Hapfelmeier *et al.*<sup>10</sup> and Neumahr *et al.*<sup>11</sup> studied the effects of isoflurane and sevoflurane on currents evoked by 1 mM GABA at recombinant  $\alpha_1\beta_2\gamma_2$  GABA<sub>A</sub> receptors. Using an ultrafast application method, they discovered that anesthetic-induced blockade of GABA<sub>A</sub> receptors results in a reduced peak current. At an intact central synapse, receptor blockade by volatile anesthetics decreases inhibitory postsynaptic current (IPSC) peak amplitudes, whereas potentiation of GABA<sub>A</sub> receptor function manifests as a prolongation of current decays. The latter effect increases GABA<sub>A</sub> receptor-mediated synaptic currents, whereas the former effect decreases synaptic currents. Because the potentiating action dominates, the overall effect of volatile anesthetics is enhancement of GABA<sub>A</sub> receptor function. Banks and Pearce<sup>9</sup> have carefully analyzed these dual actions. The concentration-response curves revealed a dissociation of the effects on the amplitude and time course of IPSCs, suggesting the involvement of distinct molecular mechanisms. This conclusion is corroborated by the recent finding that a point mutation in the  $\alpha$  subunit of the GABA<sub>A</sub> receptor abolishes the enhancing but not blocking effect of isoflurane in a recombinant system.<sup>12</sup>

\* Research Assistant, Department of Anesthesiology, Experimental Anesthesiology Section, University of Tuebingen. † Postdoctoral Fellow, Institute of Pharmacology and Toxicology, University of Zurich, Zurich, Switzerland. Current position: Ernest Gallo Clinic and Research Center, University of California, San Francisco, California. ‡ Visiting Professor of Molecular Neuropharmacology, Institute of Pharmacology and Toxicology, University of Zurich. Director of Laboratory of Genetic Neuropharmacology, McLean Hospital, Harvard Medical School, Belmont, Massachusetts. § Professor of Experimental Anesthesiology, Department of Anesthesiology, Experimental Anesthesiology Section, University of Tuebingen.

Received from the Department of Anesthesiology, Experimental Anesthesiology Section, University of Tuebingen, Tuebingen, Germany. Submitted for publication December 15, 2005. Accepted for publication April 10, 2006. Supported in part by grant No. 01KS9602 from the Federal Ministry of Education and Research, Berlin, Germany and the Interdisciplinary Center of Clinical Research, Tuebingen, Germany.

Address correspondence to Dr. Drexler: Department of Anesthesiology, Experimental Anesthesiology Section, University of Tuebingen, Schaffhausenstr. 113, D-72072 Tuebingen, Germany. berthold.drexler@uni-tuebingen.de. Individual article reprints may be purchased through the Journal Web site, www.anesthesiology.org.

Taken together, these observations raise the question of whether the  $\beta_3$ (N265M) mutation exclusively modulates the potentiating action or both the blocking and potentiating actions of volatile anesthetics. So far, experimental data demonstrating how volatile anesthetics modulate GABAergic synaptic transmission at intact synapses in preparations derived from  $\beta_3$ (N265M) mutant mice are absent. In the case that the mutation exclusively alters anesthetic-induced prolongation of IPSC decay times, while leaving the blocking action unchanged, the mutation should turn the overall potentiating effect of volatile anesthetics into a blocking one. This hypothetical mechanism would greatly complicate the interpretation of data originating from comparative behavioral studies on wild-type and  $\beta_3$ (N265M) mutant mice.<sup>3-5</sup>

In the current work, we first explore the effects of enflurane on GABA<sub>A</sub> receptor-mediated IPSCs recorded from neurons in cultured neocortical brain slices, derived from wild-type and  $\beta_3$ (N265M) mutant mice. Enflurane was chosen for this investigation because its dual actions on GABA<sub>A</sub> receptors have been characterized in great detail previously.<sup>9,13</sup> In a previous study, the action of enflurane on spontaneous action potential firing of neocortical neurons in brain slices from wild-type and  $\beta_3$ (N265M) mutant mice has been examined only for one single small concentration.<sup>3</sup> Therefore, here we compare the effects of this volatile anesthetic over a variety of concentrations to test whether  $\beta_3$ -containing GABA<sub>A</sub> receptors are involved in the depressant effects of volatile anesthetics on neocortical neurons reported recently.<sup>14</sup>

## Materials and Methods

### Animals

Mice of both sexes homozygous for an asparagine to methionine point mutation at position 265 of the GABA<sub>A</sub> receptor  $\beta_3$  subunit (N265M) and homozygous wild-type controls on the same genetic background as described previously (statistically 87.5% 129/SvJ, 12.5% 129/Sv) were used for this study.<sup>3</sup> All procedures were approved by the animal care committee (Eberhard-Karls-University, Tuebingen, Germany) and were in accordance with German law on animal experimentation.

### Organotypic Slice Cultures

Neocortical slice cultures were prepared from 2- to 5-day-old mice as described by Gähwiler *et al.*<sup>15,16</sup> In brief, for the preparation of somatosensory cortex, animals were deeply anesthetized with halothane and decapitated. Cortical hemispheres were aseptically removed and stored in ice-cold Gey solution. After removal of the meninges, 300- $\mu$ m-thick coronal slices were cut. Slices were transferred onto clean glass coverslips and

embedded in a plasma clot. The coverslips were transferred into plastic tubes (Nunc, Roskilde, Denmark) containing 750  $\mu$ l nutrition medium and incubated in a roller drum at 37°C. After 1 day in culture, antimetabolites were added. The suspension and the antimetabolites were renewed twice a week. Cultures were used after 2 weeks *in vitro*.

### Preparation and Application of Test Solutions

Test solutions were prepared by dissolving enflurane in artificial cerebrospinal fluid (ACSF) to yield the desired concentration as described previously.<sup>13</sup> A closed, air-free system was used to prevent evaporation of the anesthetic.

Enflurane (Abbott, Wiesbaden, Germany) was applied *via* bath perfusion using syringe pumps (ZAK, Marktheidenfeld, Germany), connected to the experimental chamber *via* Teflon tubing (Lee, Frankfurt, Germany). The flow rate was approximately 1 ml/min. When switching from ACSF to drug-containing solutions, the medium in the experimental chamber was replaced by at least 95% within 2 min. Effects of the anesthetic were stable approximately 5 min later. To ensure steady state conditions, recordings during anesthetic treatment were performed 10 min after commencing the change of the perfusate.

### Electrophysiology

Extracellular network recordings were performed in a recording chamber mounted on an inverted microscope. Slices were perfused with ACSF consisting of 120 mM NaCl, 3.3 mM KCl, 1.13 mM NaH<sub>2</sub>PO<sub>4</sub>, 26 mM NaHCO<sub>3</sub>, 1.8 mM CaCl<sub>2</sub>, and 11 mM glucose. ACSF was bubbled with 95% oxygen and 5% carbon dioxide. ACSF-filled glass electrodes with a resistance of approximately 3–5 M $\Omega$  were positioned on the surface of the slices and advanced into the tissue until extracellular spikes exceeding 100  $\mu$ V in amplitude were visible. All experiments were conducted at 34°–36°C. Data were acquired on a personal computer with the Digidata 1200 AD/DA interface and Axoscope 9 software (Axon Instruments, Foster City, CA).

Whole cell patch clamp recordings were performed with an EPC 7 amplifier (List, Darmstadt, Germany) at room temperature. Extracellular medium consisted of 120 mM NaCl, 3.3 mM KCl, 1.13 mM NaH<sub>2</sub>PO<sub>4</sub>, 1 mM MgCl<sub>2</sub>, 26 mM NaHCO<sub>3</sub>, 1.8 mM CaCl<sub>2</sub>, and 11 mM glucose. To block glutamatergic currents, 6-cyano-7-nitroquinoxaline-2,3-dione and DL-2-amino-5-phosphonopentanoic acid (50  $\mu$ M each) were added to the extracellular medium. Cells in neocortical slices were identified as pyramidal neurons according to their morphologic appearance on a television monitor using infrared illumination and a 40 $\times$  water immersion objective. Patch pipettes were fabricated from borosilicate glass using a P-2000 laser puller (Sutter Instruments, Novato, CA), fire

polished, and coated with Sylgard (Dow Corning, Seneffe, Belgium) to reduce electrode capacitance. When filled with recording solution containing 145 mM CsCl, 1 mM  $\text{MgCl}_2$ , 5 mM EGTA, 10 mM HEPES, and 4 mM ATP at pH 7.2, patch pipettes had a resistance of 1.5–3.5 M $\Omega$ . Neurons were held at  $-70$  mV. IPSCs were sampled at 10 kHz with the Digidata 1200 AD/DA interface and Clampex 9.0 software (Axon Instruments) for a recording period of 180 s.

### Data Analysis

Extracellular recorded spikes were counted offline using custom routines in OriginPro7 (OriginLab Corporation, Northampton, MA). The mean of spikes occurring during a recording period of 180 s was used as the average spike rate.

Inhibitory postsynaptic current data were analyzed offline using self-written programs in OriginPro7. Spontaneous events were counted using an automated event detection algorithm. Events were discarded if the next event occurred during the decay tail ("stacked" events). Decay phases were best fit by two exponential components, using a biexponential equation in the form

$$I(t) = A_f \exp(-t/\tau_{\text{fast}}) + A_s \exp(-t/\tau_{\text{slow}}) + c,$$

where  $I(t)$  is the current amplitude at any given time  $t$ ;  $c$  is the baseline current;  $\tau_{\text{fast}}$  and  $\tau_{\text{slow}}$  are the fast and slow time constants of current decay, respectively; and  $A_f$  and  $A_s$  are the estimated fast and slow intercepts of the components at time zero.<sup>17</sup> Drug-induced changes in the net charge transferred during GABA<sub>A</sub> receptor-mediated synaptic events were estimated by calculating the area under the curve of averaged IPSCs. Furthermore, the frequency and amplitudes of IPSCs were evaluated in the absence and presence of the anesthetic.

We used the Student  $t$  test for statistical testing.  $P$  values less than 0.05 were considered significant. All results are given as mean  $\pm$  SEM.

## Results

### Spontaneous Inhibitory Postsynaptic Currents from Wild-type and $\beta_3$ (N265M) Mutant Mice Do Not Differ under Control Conditions

We sampled spontaneous IPSCs from pyramidal cells in cultured brain slices derived from the somatosensory cortex of wild-type and  $\beta_3$ (N265M) mutant mice by performing whole cell patch clamp recordings in the voltage clamp mode. Spontaneous IPSCs were characterized by frequency of occurrence, amplitude, the rapid and slow phases of current decay, and net charge transfer. IPSC characteristics as obtained in the absence of enflurane are summarized in figure 1. The frequency of occurrence was  $2.01 \pm 0.14$  Hz ( $n = 44$ ) in the wild-type slices and  $1.91 \pm 0.16$  Hz ( $n = 33$ ) in the  $\beta_3$ (N265M)

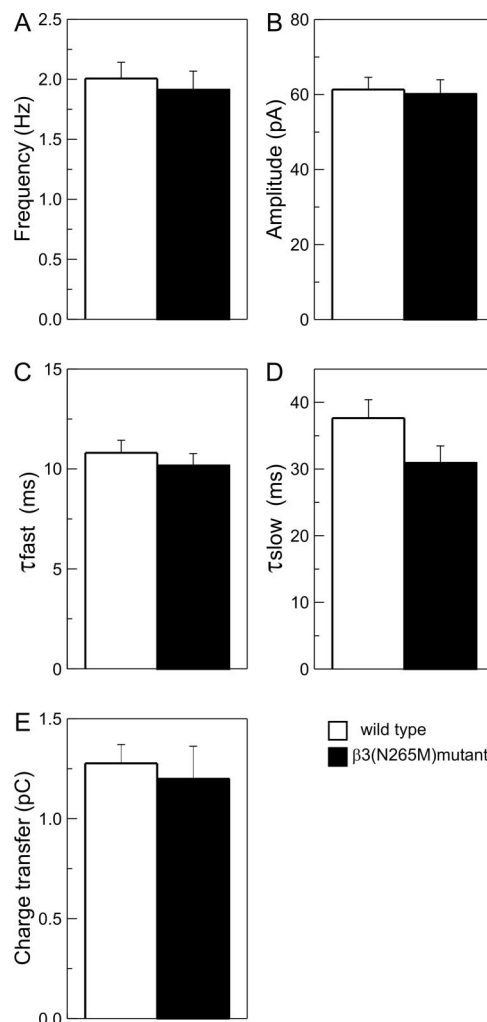

**Fig. 1.** Characteristics of spontaneous inhibitory postsynaptic potentials (IPSCs) in cultured neocortical neurons of wild-type (WT, *white*) and  $\beta_3$ (N265M) mutant (MU, *black*) mice as obtained under control conditions. There are no significant differences between the two preparations regarding (A) frequency (WT  $2.01 \pm 0.14$  Hz,  $n = 44$ , and MU  $1.91 \pm 0.16$  Hz,  $n = 33$ ;  $P > 0.5$ ), (B) amplitude of the mean IPSC (WT  $61.34 \pm 3.25$  pA,  $n = 43$ , and MU  $60.15 \pm 3.79$  pA,  $n = 32$ ;  $P > 0.5$ ), (C) fast component of the current decay ( $\tau_{\text{fast}}$ ; WT  $10.81 \pm 0.63$  ms,  $n = 41$ , and MU  $10.17 \pm 0.60$  ms,  $n = 33$ ;  $P > 0.1$ ), (D) slow component of the current decay ( $\tau_{\text{slow}}$ ; WT  $37.65 \pm 2.76$  ms,  $n = 42$ , and MU  $30.92 \pm 2.55$  ms,  $n = 32$ ;  $P > 0.05$ ), and (E) the charge transfer, measured as the area under the curve of averaged IPSCs (WT  $1.28 \pm 0.09$  pC,  $n = 41$ , and MU  $1.20 \pm 0.16$  pC,  $n = 34$ ;  $P > 0.5$ ).

mutant slices. These mean values were not statistically different. Similarly, peak amplitudes of averaged IPSCs did not differ between slices from wild-type ( $61.34 \pm 3.25$  pA,  $n = 43$ ) and  $\beta_3$ (N265M) mutant mice ( $60.15 \pm 3.79$  pA,  $n = 32$ ). Current decays were fitted by two time constants ( $\tau_{\text{fast}}$  and  $\tau_{\text{slow}}$ ) using a biexponential model. The fast component of the decay time was  $10.81 \pm 0.63$  ms ( $n = 41$ ,  $73.5 \pm 2.2\%$  of amplitude) in the wild-type and  $10.17 \pm 0.60$  ms ( $n = 33$ ,  $75.7 \pm 3.4\%$  of amplitude) in  $\beta_3$ (N265M) mutant slices. Regarding the slow phase of the current decay, the  $\beta_3$ (N265M) mutant showed



smaller values ( $30.92 \pm 2.55$  ms,  $n = 32$ ) than the wild type ( $37.65 \pm 2.76$  ms,  $n = 42$ ). However, this difference did not reach statistical significance. Previous investigators have reported similar values for neocortical pyramidal neurons.<sup>18</sup> Finally, we calculated the area under the curve as a measure of charge transfer. These values were also not different between wild-type ( $1.28 \pm 0.09$  pC,  $n = 41$ ) and  $\beta_3$ (N265M) mutant ( $1.20 \pm 0.16$  pC,  $n = 34$ ) mice. In summary, IPSC parameters did not differ between wild-type and  $\beta_3$ (N265M) mutant mice in the absence of enflurane.

*Different Actions of Enflurane on Spontaneous Inhibitory Postsynaptic Currents in Wild-type and  $\beta_3$ (N265M) Mutant Neurons at Concentrations Below 1 MAC*

Representative recordings of spontaneous IPSCs in slices from wild-type mice, performed in the absence and presence of enflurane (0.6 mM), are shown in figure 2A. The anesthetic reduced IPSC amplitudes and prolonged current decays. In figures 2B–D, averaged IPSCs are displayed. The current decay was prolonged by 0.3 mM enflurane, and the amplitude was slightly decreased (fig. 2C). Both effects were stronger in the presence of 0.6 mM enflurane (fig. 2D).

In figure 2E, representative traces obtained from experiments on  $\beta_3$ (N265M) mutant slices are presented. Enflurane at 0.3 mM did not attenuate the amplitude of the averaged IPSC, and the current decay was only marginally prolonged (figs. 2F–G). The latter effect was enhanced at 0.6 mM enflurane but still less pronounced compared with the IPSCs monitored in slices from wild-type mice (fig. 2H). Even at this high concentration, enflurane did not reduce the amplitude of the mean IPSC in the  $\beta_3$ (N265M) mutant.

Figure 3 summarizes the effects of enflurane on IPSCs monitored in wild-type and  $\beta_3$ (N265M) mutant slices. The effects of the anesthetic on the amplitudes of averaged IPSCs are displayed in figure 3A: At 0.3 mM, enflurane did not change the IPSC amplitudes significantly, but there was a trend to smaller values in the wild type ( $50.08 \pm 3.97$  pA,  $n = 14$ ) compared with mutant ( $63.72 \pm 6.24$  pA,  $n = 9$ ). At 0.6 mM enflurane, however, the amplitude of the averaged IPSC was significantly reduced in the wild type ( $37.15 \pm 2.64$  pA,  $n = 13$ ), whereas no such effect could be observed in the  $\beta_3$ (N265M) mutant ( $66.59 \pm 6.35$  pA,  $n = 7$ ). Figure 3B shows the actions of enflurane on the rapid phase of the current decay ( $\tau_{fast}$ ). This parameter was prolonged by enflurane in a concentration dependent manner in the wild type (0.3 mM enflurane  $17.42 \pm 1.07$  ms,  $n = 14$ ; 0.6 mM enflurane  $23.49 \pm 2.26$  ms,  $n = 12$ ) but not in the  $\beta_3$ (N265M) mutant (0.3 mM enflurane  $9.59 \pm 0.42$  ms,  $n = 8$ ; 0.6 mM enflurane  $12.36 \pm 0.96$  ms,  $n = 8$ ). Prolongation of  $\tau_{fast}$  in the wild-type was significantly different from the  $\beta_3$ (N265M) mutant and from control condi-

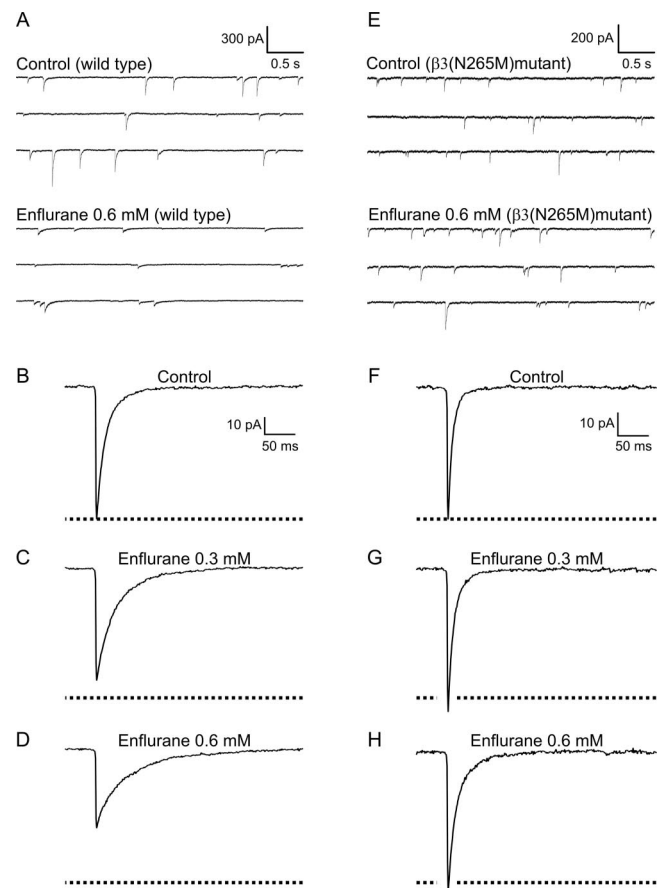

**Fig. 2.** Effects of enflurane on spontaneous inhibitory postsynaptic currents (IPSCs) recorded from neocortical neurons of wild-type and  $\beta_3$ (N265M) mutant mice. (A–D) Data obtained from wild-type mice. (A) Continuous recordings (12 s) under control conditions (upper three traces) and in the presence of 0.6 mM enflurane (bottom three traces). (B) Mean IPSC calculated from synaptic events occurring during a 180-s recording under control conditions. (C) In the presence of 0.3 mM enflurane (approximately 0.5 minimum alveolar concentration [MAC]), the amplitude of the averaged IPSC is only slightly reduced, whereas the decay time is prolonged. (D) These dual actions of enflurane are further enhanced at 0.6 mM enflurane (approximately 1 MAC). (E–H) Actions of enflurane on IPSCs recorded from  $\beta_3$ (N265M) mutant mice neurons. (E) Representative trace (12 s) in the absence (upper three traces) and in the presence of 0.6 mM enflurane (bottom three traces). (F) Mean IPSC obtained from a 180-s recording under control conditions. (G) In the presence of 0.3 mM enflurane, amplitude and current decay of the averaged IPSC are almost unchanged. (H) At 0.6 mM enflurane (approximately 1 MAC), the amplitude of the mean IPSC remains unchanged, whereas the decay time is only moderately prolonged in the  $\beta_3$ (N265M) mutant neuron.

tions. The corresponding effects of enflurane on the slow phase of the current decay ( $\tau_{slow}$ ) are presented in figure 3C. Again, enflurane led to longer decay times in the wild type but not in the  $\beta_3$ (N265M) mutant. In the wild type, enflurane (0.3 mM) increased  $\tau_{slow}$  to  $66.14 \pm 3.87$  ms ( $n = 14$ ), an effect that was further enhanced at 0.6 mM enflurane to  $117.45 \pm 12.86$  ms ( $n = 12$ ). In contrast, in the  $\beta_3$ (N265M) mutant, there was only a minor prolongation to  $37.16 \pm 4.66$  ms ( $n = 8$ ) at 0.3 mM enflurane and to  $35.74 \pm 3.74$  ms ( $n = 8$ ) at 0.6 mM.

**Fig. 3.** Enflurane-induced changes in characteristics of inhibitory postsynaptic currents calculated from recordings on wild-type (*white*) and  $\beta_3$ (N265M) mutant mice (*black*) neocortical neurons. (A) Enflurane (0.6 mM) causes a significant reduction of the amplitude of the mean inhibitory postsynaptic current in wild-type ( $P < 0.05$ ) but not in  $\beta_3$ (N265M) mutant mice neurons. (B) Enflurane prolongs the fast component of the decay time ( $\tau_{\text{fast}}$ ) in a dose-dependent manner in the wild-type ( $P < 0.05$ ). In the  $\beta_3$ (N265M) mutant, however, the values in the presence of 0.3 and 0.6 mM enflurane are not significantly different from control condition. (C) Regarding the slow component of the current decay ( $\tau_{\text{slow}}$ ), enflurane again only causes a significant prolongation in the wild-type ( $P < 0.05$ ) but not in neurons from  $\beta_3$ (N265M) mutant mice. (D) In wild-type neurons, enflurane enhances the charge transfer in a dose-dependent manner ( $P < 0.05$ ), whereas there is only a slight increase in the presence of 0.6 mM enflurane in the  $\beta_3$ (N265M) mutant. \*  $P < 0.05$  compared to control condition and to  $\beta_3$ (N265M) mutant.

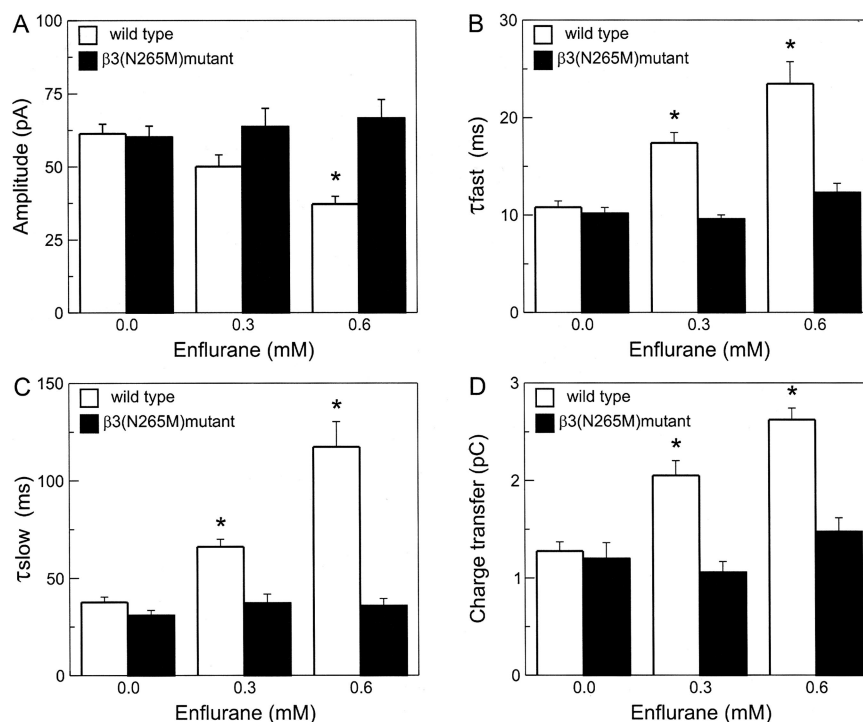

Again, the effect of enflurane on the wild-type preparation was significantly different from  $\beta_3$ (N265M) mutant preparations and from control conditions.

To draw conclusions about the overall effect of enflurane on IPSCs, we calculated the net charge transferred by averaged IPSCs (fig. 3D). In wild-type preparations, this parameter was increased by enflurane in a concentration-dependent manner (0.3 mM enflurane  $2.05 \pm 0.15$  pC,  $n = 13$ ; 0.6 mM enflurane  $2.62 \pm 0.12$  pC,  $n = 12$ ). In the  $\beta_3$ (N265M) mutant, however, only a small and nonsignificant effect was observed (0.3 mM enflurane  $1.06 \pm 0.11$  pC,  $n = 9$ ; 0.6 mM enflurane  $1.48 \pm 0.14$  pC,  $n = 7$ ). The net charge transferred during IPSCs as determined in the presence of enflurane in wild-type slices was significantly different from control conditions as well as from the charge transferred in  $\beta_3$ (N265M) mutant slices in the presence of the anesthetic.

The frequency of spontaneous IPSCs was decreased by enflurane in a concentration-dependent manner in both preparations (table 1), but no significant difference was observed between wild-type and  $\beta_3$ (N265M) mutant slices.

#### *At Sedative and Hypnotic Concentrations Enflurane Exerts Stronger Depression of Spontaneous Action Potential Firing in Wild-type Than in $\beta_3$ (N265M) Mutant Neocortical Slices*

The effects of enflurane on spontaneous action potential firing of neocortical neurons were investigated. As in our previous studies, spontaneous neuronal activity was reinforced by removing  $\text{Mg}^{2+}$  ions from the extracellular solution.<sup>19</sup> Under control conditions, action potential firing occurred typically in bursts (episode of ongoing activity). In slices from wild-type mice, episodes of ongoing activity showed a frequency of  $0.16 \pm 0.01$  Hz ( $n = 51$ ). In  $\beta_3$ (N265M) mutant cultures, this frequency was  $0.15 \pm 0.01$  Hz ( $n = 53$ ). These mean values were not statistically different and lie in the range of previously reported values.<sup>19</sup> Mean action potential rates were slightly higher in slices from wild-type than in  $\beta_3$ (N265M) mutant preparations ( $13.62 \pm 2.03$  vs.  $9.93 \pm 0.86$  Hz,  $n = 65/64$ ), but this did not reach statistical significance. In summary, activity patterns monitored in slices from wild-type and  $\beta_3$ (N265M) mutant mice did not differ under control conditions.

**Table 1.** Effects of Enflurane on IPSC Frequency

| IPSC Frequency   | Wild Type                        | $\beta_3$ (N265M) Mutant        |
|------------------|----------------------------------|---------------------------------|
| Control          | $2.01 \pm 0.14$ Hz ( $n = 44$ )  | $1.91 \pm 0.16$ Hz ( $n = 33$ ) |
| 0.3 mM enflurane | $1.16 \pm 0.18$ Hz ( $n = 13$ )* | $1.28 \pm 0.22$ Hz ( $n = 9$ )  |
| 0.6 mM enflurane | $0.94 \pm 0.16$ Hz ( $n = 12$ )* | $0.93 \pm 0.18$ Hz ( $n = 7$ )* |

Frequency of spontaneous inhibitory postsynaptic currents (IPSCs) monitored in wild-type and in  $\beta_3$ (N265M) mutant cortical slice cultures.

\*  $P < 0.05$  compared with control condition.

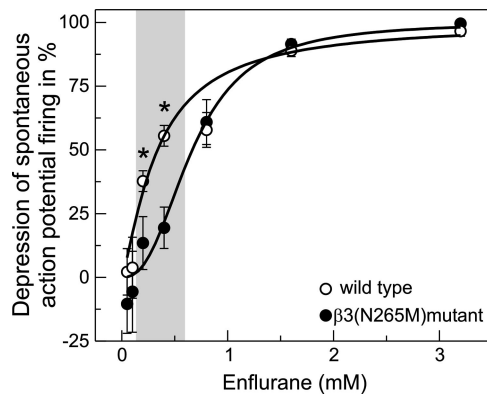

**Fig. 4.** Concentration-dependent depression of spontaneous action potential firing in cultured neocortical slices by enflurane. The anesthetic reduces action potential activity in both wild-type (white) and  $\beta_3$ (N265M) mutant mice (black) preparations. At concentrations between minimum alveolar concentration (MAC)-awake and MAC-immobility (light gray rectangle), this depression is significantly smaller in the  $\beta_3$ (N265M) mutant. The curves were fitted with Hill equations. The calculated median effective concentrations ( $EC_{50}$  values) were 0.34 mM for the wild-type and 0.67 mM for  $\beta_3$ (N265M) mutant mice preparations. \*  $P < 0.05$  compared to  $\beta_3$ (N265M) mutant.

Enflurane depressed spontaneous action potential firing in a concentration-dependent manner in cultures from both wild-type and  $\beta_3$ (N265M) mutant mice (fig. 4). At concentrations of 0.2 and 0.4 mM, enflurane depressed action potential firing in the wild type to a significantly greater extent than in the  $\beta_3$ (N265M) mutant (0.2 mM enflurane: WT  $37.75 \pm 4.06\%$ ,  $n = 25$ , MU  $13.45 \pm 10.4\%$ ,  $n = 18$ ; 0.4 mM enflurane: WT  $55.53 \pm 4.08\%$ ,  $n = 20$ , MU  $19.44 \pm 8.13\%$ ,  $n = 15$ ). However, at higher concentrations, enflurane was similarly effective in slices from wild-type and  $\beta_3$ (N265M) mutant mice.

## Discussion

### Characteristics of Spontaneous IPSCs under Drug-free Conditions

In recombinant  $\alpha_2\beta_3\gamma_2$  GABA<sub>A</sub> receptors expressed in human embryonic kidney 293 cells, the  $\beta_3$ (N265M) mutation may alter channel gating, agonist binding, or both. Support for the latter conclusion is derived from the finding that  $EC_{50}$  values for activation of  $\alpha_2\beta_3\gamma_2$  receptors by GABA were 47  $\mu$ M in wild-type and 122  $\mu$ M in  $\alpha_2\beta_3$ (N265M) $\gamma_2$  receptors.<sup>6</sup> This prompts the question of whether the change in GABA efficacy, introduced by the mutation, is mirrored in the time course of IPSCs. In our study, IPSCs from wild-type and  $\beta_3$ (N265M) mutant mice did not differ under drug-free conditions regarding frequency, amplitude, current decay, and charge transfer (fig. 1). This observation is based on 44 recordings in neocortical slices prepared from wild-type and 33 recordings in slices from  $\beta_3$ (N265M) mutant mice. By monitoring from a single neuron, 200–300 IPSCs were sampled and used for further analysis. The finding that under drug-free conditions IPSCs did not differ in slices

from wild-type and mutant mice implies that GABA<sub>A</sub> receptors involved in these IPSCs were exposed to almost saturating agonist concentrations.<sup>7</sup> At first glance, this explanation seems to be at variance with the data published by Liao *et al.*<sup>4</sup> These authors report that in the absence of anesthetics,  $\beta_3$ (N265M) mutant mice display less freezing in a pavlovian fear conditioning paradigm compared with wild-type mice. One of a number of possibilities to explain this difference is that extrasynaptic GABA<sub>A</sub> receptors in the hippocampus, cerebellum, or neocortex may be playing an important role in such a behavioral outcome. Because of their location, these extrasynaptic receptors are exposed to GABA concentrations much lower than in the synaptic cleft,<sup>7,20</sup> possibly close to the  $EC_{50}$  values cited above.

### Actions of Enflurane on Spontaneous IPSCs

When recording miniature IPSCs from hippocampal pyramidal cells, Banks and Pearce<sup>9</sup> observed that at concentrations close to 1 MAC-immobility (0.58 mM) enflurane depressed IPSC amplitudes by 40% and increased the time constant of current decay by 3.5-fold. These findings are consistent with results obtained with cerebellar Purkinje cells, which express almost exclusively GABA<sub>A</sub> receptors composed of  $\alpha_1\beta_2\gamma_2$  subunits.<sup>13</sup> In the latter study, enflurane (0.64 mM) attenuated amplitudes of miniature and spontaneous IPSCs by 55% and increased current decay times by 5.1-fold. This indicates that these GABA<sub>A</sub> receptors are also sensitive to enflurane and that the blocking effects are not subtype specific.

In the current work, effects of enflurane on spontaneous IPSCs recorded from neocortical neurons in brain slices prepared from wild-type mice were comparable with the results mentioned above. At 0.6 mM, IPSC amplitudes were decreased by 39%, and decay times were prolonged by 117% ( $\tau_{fast}$ ) and 211% ( $\tau_{slow}$ ), respectively.

How is this blocking and potentiating action of enflurane altered by the  $\beta_3$ (N265M) mutation? The results summarized in figure 3 indicate that the mutation eliminates both effects. This stands in contrast to the S270H mutation, which was introduced in the  $\alpha_1$  subunit of recombinant  $\alpha_1\beta_2\gamma_2$  GABA<sub>A</sub> receptors, which exclusively affects the potentiating action of the volatile anesthetic isoflurane, leaving anesthetic-induced receptor blockade unaltered.<sup>12</sup>

Because the  $\beta_3$ (N265M) mutation abolished both (*i.e.*, the prolongation of current decay and the blocking action of enflurane), the different effects of the anesthetic on spontaneous action potential activity monitored in slices from wild-type and  $\beta_3$ (N265M) mutant mice can be explained as follows: The weaker depression by enflurane in the  $\beta_3$ (N265M) mutant at concentrations between MAC-awake and MAC-immobility (fig. 4) does not involve blockade of mutated GABA<sub>A</sub> receptors but is



produced by the lack of an effect of enflurane on mutated  $\beta_3$ -containing GABA<sub>A</sub> receptors in this concentration range.

How can we explain that the  $\beta_3$ (N265M) mutation abolishes both the blocking and potentiating effects of enflurane? One possibility is that both potentiation and inhibition arise from occupation of a molecular site that is disrupted by the mutation. Another possibility is that the mutation is distant from the enflurane binding site but produces a conformational change, thereby affecting both the prolonging and blocking action of the anesthetic.

The finding that the effects of enflurane on IPSCs were largely abolished by the  $\beta_3$ (N265M) mutation indicates that a major fraction of IPSCs represented currents carried by  $\beta_3$ -containing GABA<sub>A</sub> receptors. This was unexpected, because only approximately 15–20% of all GABA<sub>A</sub> receptors in the neocortex contain  $\beta_3$  subunits.<sup>21</sup> However, neocortical pyramidal cells are innervated by different classes of GABAergic interneurons.<sup>22</sup> Furthermore, specific synaptic contacts, as defined by the identity of the presynaptic cell, frequently show specific GABA<sub>A</sub> receptor subtypes. For example,  $\alpha_1$  subunits, which most commonly coassemble with  $\beta_2$  subunits, are enriched at synapses between fast spiking basket cells and pyramidal cells.<sup>23</sup> In contrast,  $\alpha_2$  subunits, which frequently coassemble with  $\beta_3$  subunits, are enriched at synapses between cholecystinin-positive basket cells and pyramidal cells. It seems unlikely that under our recording conditions ( $\alpha$ -amino-3-hydroxy-5-methyl-4-isoxazolepropionic acid and *N*-methyl-D-aspartate receptors were blocked to isolate GABA<sub>A</sub> receptor-mediated events) fast spiking basket cells were active, because these neurons exhibit a rather negative membrane resting potential.<sup>24</sup> Therefore, IPSCs monitored in the course of our experiments may predominantly originate from a yet unidentified subpopulation of interneurons, namely those displaying the most positive membrane resting potential.

At 0.6 mM, we observed that enflurane decreased the frequency of spontaneous IPSCs by approximately 30%. This effect probably results from a decrease in spontaneous action potential firing of presynaptic neurons, because at the concentrations tested in this study, the anesthetic does not depress action potential-independent GABA release.<sup>9</sup> Because GABAergic interneurons express GABA<sub>A</sub> receptors, these may also have been the mediators of enflurane-induced depression of presynaptic activity.<sup>25</sup> Interestingly, attenuation of presynaptic activity by enflurane did not differ between wild-type and  $\beta_3$ (N265M) mutant mice. This finding is consistent with the observation that  $\beta_3$  subunits are mostly expressed in pyramidal cells and not in GABAergic interneurons.<sup>26</sup>

#### *Are $\beta_3$ -Containing GABA<sub>A</sub> Receptors in the Neocortex Relevant Targets for Volatile Anesthetics?*

By combining *in vivo* and *in vitro* recordings, Hentschke *et al.*<sup>14</sup> have recently identified the neocortex as a major target of subhypnotic concentrations of enflurane. The authors showed that concentration-dependent depression of spontaneous action potential firing of neurons in the somatosensory cortex caused by enflurane is almost identical *in vivo* and in isolated cortical brain slices, indicating a minor contribution of subcortical structures. In the same study, GABA<sub>A</sub> receptors, located on cortical pyramidal cells, were identified as a prime target of the anesthetic.

Here we report that at clinically relevant concentrations between MAC-awake and MAC-immobility, enflurane depresses spontaneous action potential firing in cortical slices from  $\beta_3$ (N265M) mutant mice to a lesser extent than in slices from wild-type mice, suggesting that  $\beta_3$ -containing GABA<sub>A</sub> receptors significantly contribute to this effect.

However,  $\beta_3$ -containing GABA<sub>A</sub> receptors are not the exclusive molecular target of enflurane, because at concentrations exceeding MAC-immobility, full suppression of neuronal activity also occurred in slices from  $\beta_3$ (N265M) mutant mice.

How do these findings on cortical neurons *in vitro* relate to the observation that enflurane concentrations causing loss of righting reflexes do not differ in wild-type and  $\beta_3$ (N265M) mutant mice?<sup>5</sup> The latter result clearly indicates that ablation of righting reflexes does not involve effects of enflurane on neocortical neurons. Righting reflexes are mediated by brainstem centers including the vestibular nuclei in the medulla and pontine reticular nuclei, integrating mechanoreceptor input into motor commands. In fact, focal application of barbiturates into the brainstem mesopontine tegmentum ablates the righting reflex.<sup>27,28</sup> Furthermore, discrete injections of GABA<sub>A</sub> receptor agonists in the tuberomammillary nucleus produce loss of righting reflexes.<sup>29</sup> Therefore, enflurane possibly abolishes righting reflexes *via* these routes and not *via* depressing neocortical neurons. In addition, the data discussed so far suggest that the molecular targets by which enflurane depresses cortical neurons and abolishes righting reflexes are distinct. Assuming that righting reflexes involve anesthetic actions in brainstem nuclei, but not in neocortex, enflurane-sensitive ion channels in the neocortex and brainstem should be different molecular entities. What channels are abundant in only one of these brain regions? Strychnine-sensitive glycine receptors are expressed in the brainstem, but not in neocortical networks.<sup>30</sup> Glycine and GABA<sub>A</sub> receptors are equally sensitive to volatile anesthetics.<sup>31</sup> Therefore, we speculate that enflurane ablates righting reflexes largely *via* molecular targets located in subcortical structures. These may include gly-

cine receptors, non- $\beta_3$  subunit-containing GABA<sub>A</sub> receptors, and possibly yet unidentified molecular targets.

Taken together, our results provide further evidence for the hypothesis that the sedative and hypnotic properties of anesthetic agents are related to drug actions in different parts of the brain.<sup>2</sup> While sedation involves targets in the neocortex, hypnosis, as defined by the absence of righting reflexes, seems to be mediated predominantly by subcortical structures.

The authors thank Claudia Holt (Technical Assistant, Eberhard-Karls-University, Tuebingen, Germany) for excellent technical assistance.

## References

- Sandstrom DJ, Nash H: Drug targets: Turning the channel (on) for sedation. *Curr Biol* 2004; 14:R185-6
- Rudolph U, Antkowiak B: Molecular and neuronal substrates for general anaesthetics. *Nat Rev Neurosci* 2004; 5:709-20
- Jurd R, Arras M, Lambert S, Drexler B, Siegwart R, Crestani F, Zaugg M, Vogt KE, Ledermann B, Antkowiak B, Rudolph U: General anesthetic actions *in vivo* strongly attenuated by a point mutation in the GABA<sub>A</sub> receptor  $\beta_3$  subunit. *FASEB J* 2003; 17:250-2
- Liao M, Sonner JM, Jurd R, Rudolph U, Borghese CM, Harris RA, Laster MJ, Eger EI:  $\beta_3$ -containing gamma-aminobutyric acid<sub>A</sub> receptors are not major targets for the amnesic and immobilizing actions of isoflurane. *Anesth Analg* 2005; 101:412-8
- Lambert S, Arras M, Vogt KE, Rudolph U: Isoflurane-induced surgical tolerance mediated only in part by  $\beta_3$ -containing GABA<sub>A</sub> receptors. *Eur J Pharmacol* 2005; 516:23-7
- Siegwart R, Jurd R, Rudolph U: Molecular determinants for the action of general anesthetics at recombinant  $\alpha 2\beta 3\gamma 2$   $\gamma$ -aminobutyric acid A receptors. *J Neurochem* 2002; 80:140-8
- Mody I, Pearce RA: Diversity of inhibitory neurotransmission through GABA<sub>A</sub> receptors. *Trends Neurosci* 2004; 27:569-75
- Evers AS, Steinbach JH: Double-edged swords: Volatile anesthetics both enhance and inhibit ligand-gated ion channels. *ANESTHESIOLOGY* 1999; 90:1-3
- Banks MI, Pearce RA: Dual actions of volatile anesthetics on GABA<sub>A</sub> IPSCs: Dissociation of blocking and prolonging effects. *ANESTHESIOLOGY* 1999; 90:120-34
- Hapfelmeier G, Schneck H, Kochs E: Sevoflurane potentiates and blocks GABA-induced currents through recombinant  $\alpha 1\beta 2\gamma 2$  GABA<sub>A</sub> receptors: Implications for an enhanced GABAergic transmission. *Eur J Anaesthesiol* 2001; 18:377-83
- Neumahr S, Hapfelmeier G, Scheller M, Schneck H, Franke C, Kochs E: Dual action of isoflurane on the  $\gamma$ -aminobutyric acid (GABA)-mediated currents through recombinant  $\alpha 1\beta 2\gamma 2$ -GABA<sub>A</sub>-receptor channels. *Anesth Analg* 2000; 90:1184-90
- Hall AC, Stevens RJ, Betts BA, Yeung WY, Kelley JC, Harrison NL: Subunit-dependent block by isoflurane of wild-type and mutant  $\alpha 1(S270H)$  GABA<sub>A</sub> receptor currents in *Xenopus* oocytes. *Neurosci Lett* 2005; 382:332-7
- Antkowiak B, Heck D: Effects of the volatile anesthetic enflurane on spontaneous discharge rate and GABA<sub>A</sub>-mediated inhibition of Purkinje cells in rat cerebellar slices. *J Neurophysiol* 1997; 77:2525-38
- Hentschke H, Schwarz C, Antkowiak B: Neocortex is the major target of sedative concentrations of volatile anaesthetics: strong depression of firing rates and increase of GABA receptor-mediated inhibition. *Eur J Neurosci* 2005; 21:93-102
- Gähwiler BH: Organotypic monolayer cultures of nervous tissue. *J Neurosci Methods* 1981; 4:329-42
- Gähwiler BH, Capogna M, Debanne D, McKinney RA, Thompson SM: Organotypic slice cultures: A technique has come of age. *Trends Neurosci* 1997; 20:471-7
- Orser BA, Wang L-Y, Pennefather PS, MacDonald JF: Propofol modulates activation and desensitization of GABA<sub>A</sub> receptors in cultured murine hippocampal neurons. *J Neurosci* 1994; 14:7747-60
- Galarreta M, Hestrin S: Properties of GABA<sub>A</sub> receptors underlying inhibitory synaptic currents in neocortical pyramidal neurons. *J Neurosci* 1997; 17:7220-7
- Drexler B, Roether CL, Jurd R, Rudolph U, Antkowiak B: Opposing actions of etomidate on cortical theta oscillations are mediated by different  $\gamma$ -aminobutyric acid type A receptor subtypes. *ANESTHESIOLOGY* 2005; 102:346-52
- Farrant M, Nusser Z: Variations on an inhibitory theme: Phasic and tonic activation of GABA<sub>A</sub> receptors. *Nat Rev Neurosci* 2005; 6:215-29
- Möhler H, Fritschy JM, Rudolph U: A new benzodiazepine pharmacology. *J Pharmacol Exp Ther* 2002; 300:2-8
- Markram H, Toledo-Rodriguez M, Wang Y, Gupta A, Silberberg G, Wu C: Interneurons of the neocortical inhibitory system. *Nat Rev Neurosci* 2004; 5:793-807
- Fritschy JM, Brünig I: Formation and plasticity of GABAergic synapses: Physiological mechanisms and pathophysiological implications. *Pharmacol Ther* 2003; 98:299-323
- Blatow M, Rozov A, Katona I, Hormuzdi SG, Meyer AH, Whittington MA, Caputi A, Monyer H: A novel network of multipolar bursting interneurons generates theta frequency oscillations in neocortex. *Neuron* 2003; 38:805-17
- Nishikawa K, MacIver MB: Agent-selective effects of volatile anesthetics on GABA<sub>A</sub> receptor-mediated synaptic inhibition in hippocampal interneurons. *ANESTHESIOLOGY* 2001; 94:340-7
- Sieghart W, Sperk G: Subunit composition, distribution and function of GABA<sub>A</sub> receptor subtypes. *Curr Top Med Chem* 2002; 2:795-816
- Devor M, Zalkind V: Reversible analgesia, atonia, and loss of consciousness on bilateral intracerebral microinjection of pentobarbital. *Pain* 2001; 94:101-12
- Sukhotinsky I, Hopkins DA, Lu J, Saper CB, Devor M: Movement suppression during anesthesia: Neural projections from the mesopontine tegmentum to areas involved in motor control. *J Comp Neurol* 2005; 489:425-48
- Nelson LE, Guo TZ, Lu J, Saper CB, Franks NP, Maze M: The sedative component of anesthesia is mediated by GABA<sub>A</sub> receptors in an endogenous sleep pathway. *Nat Neurosci* 2002; 5:979-84
- Rampon C, Luppi PH, Fort P, Peyron C, Jouvet M: Distribution of glycine-immunoreactive cell bodies and fibers in the rat brain. *Neuroscience* 1996; 75:737-55
- Franks NP: Molecular targets underlying general anaesthesia. *Br J Pharmacol* 2006; 147 (suppl 1):S72-81
